# Supplementary material for: Outbreak of Leptospira borgpetersenii Serogroup Sejroe Infection in Kennel: The Role of Dogs as Sentinel in Specific Environments
Source: MDPI journal article supplement (doi:10.3390/ijerph19073906), 2022-03-25
Supplement: s1 [file s1]

**Table S1.** Primers and probes used in the real-time qPCR and end-point PCR reactions.

| Assay     | Gene             | Primers and Probes                                     | Sequence                                                                                                                                         | Amplicon         | Reference |
|-----------|------------------|--------------------------------------------------------|--------------------------------------------------------------------------------------------------------------------------------------------------|------------------|-----------|
| qPCR      | <i>rrs</i> (16S) | Lepto F<br>Lepto R<br>probe                            | 5'-CCC GCGTCCGATTAG-3'<br>5'-TCCATTGTGGCCGRACAC-3'<br>(FAM)5'-CTCACCAAGGCGACGATCGGTAGC-3'(TAMRA)                                                 | 87 bp            | 16        |
| nestedPCR | <i>glmU</i>      | glmU-FM<br>glmU-RM<br>1-glmU-2F_M13<br>1-glmU-2R_M13   | AGGATAAGGTCGCTGTGGTA<br>AGTTTTTTCCGGAGTTTCT<br>TGTA AAAACGACGGCCAGT CGYATGAAAACGGATCAG<br>CAGGAAAACAGCTATGACC GGAAGRTARTATTCDCCCTG               | 650 bp<br>598 bp | 17<br>18  |
| nestedPCR | <i>pntA</i>      | pntA-FM<br>pntA-RM<br>2-pntA-2F_M13<br>2-pntA-2R_M13   | TAGGAAAARATGAAAACCRGGAAC<br>AAGAAGCAAGATCCACAAYTAC<br>TGTA AAAACGACGGCCAGT ATTTATYTVGGRATGTTYCA<br>CAGGAAAACAGCTATGACC GATTTCATRTTATCYACRAT      | 621 bp<br>607 bp | 17<br>18  |
| nestedPCR | <i>sucA</i>      | sucA-FM<br>sucA-RM<br>3-sucA-2F_M13<br>3-sucA-2R_M13   | TCATTCCACTTYTAGATACGAT<br>TCTTTTTTGAATTTTTGACG<br>TGTA AAAACGACGGCCAGT GCSGGTRATCATCWBATGG<br>CAGGAAAACAGCTATGACC GRAAWCCYTTYGCAAGATC            | 640 bp<br>552 bp | 17<br>18  |
| nestedPCR | <i>tpiA</i>      | tpiA-FM<br>tpiA-RM<br>4-tpiA-2F_M13<br>4-tpiA-2R_M13   | TTGCAGGAAACTGGAAAATGAAT<br>GTTTTACRGAACCHCCGTAGAGAAT<br>TGTA AAAACGACGGCCAGT ATTTCTYTTACGAATRAAAGARTG<br>CAGGAAAACAGCTATGACC CMCATTCGATYMRAGAAAA | 639 bp<br>555 bp | 17<br>18  |
| nestedPCR | <i>pfkB</i>      | pfkB-FM<br>pfkB-RM<br>5-pf kB-2F_M13<br>5-pf kB-2R_M13 | CGGAGAGTTTTATAARAAGGACAT<br>AGAACACCCGCCGCAAAAACAAT<br>TGTA AAAACGACGGCCAGT GTYGTATCGATCGSYTTC<br>CAGGAAAACAGCTATGACC YYCCSGAAGAYAASGGWCAT       | 588 bp<br>540 bp | 17<br>18  |
| nestedPCR | <i>mreA</i>      | mreA-FM<br>mreA-RM<br>6-mreA-2F_M13<br>6-mreA-2R_M13   | GGCTCGCTCTYGACGGAAA<br>TCCR TAACTCATAAAMGACAAAGG<br>TGTA AAAACGACGGCCAGT CRRGAAGYRGTGGATCAGG<br>CAGGAAAACAGCTATGACC CKATCCTTACTYTCRTARCT         | 719 bp<br>568 bp | 17<br>18  |
| nestedPCR | <i>caiB</i>      | caiB-F<br>caiB-R<br>7-caiB-2F_M13<br>7-caiB-2R_M13     | CAACTTGCGGAYATAGGAGGAG<br>ATTATGTTCCCGTGAYTCG<br>TGTA AAAACGACGGCCAGT CTTKCTTCRATYTTGGCG<br>CAGGAAAACAGCTATGACC AMCGATATGTWAYMGGRGTT             | 650 bp<br>589 bp | 17<br>18  |
